# Supplementary material
Source: PubMed Central journal article supplement (PMC3413242)
Supplement: bi300279b_si_001.pdf [file bi300279b_si_001.pdf]

**Structural and biochemical consequences of disease-causing mutations in the ankyrin  
repeat domain of the human TRPV4 channel**

Hitoshi Inada, Erik Procko, Marcos Sotomayor, and Rachelle Gaudet

Supporting Information

---

**Table S1.** TRPV-ARD structures used in this study

---

| Protein | Species | Structure (# mol/a.u.)         | ATP binding | References                                        |
|---------|---------|--------------------------------|-------------|---------------------------------------------------|
| TRPV1   | Rat     | 2PNN (1), 2NYJ (1)             | +           | Lishko <i>et al.</i> , 2007<br>(ATP-bound forms)  |
| TRPV2   | Rat     | 2ETA (2), 2ETB (1), 2ETC (2)   | –           | Jin <i>et al.</i> , 2006                          |
|         | Human   | 2F37 (2)                       |             | McCleverty <i>et al.</i> , 2006                   |
| TRPV4   | Human   | Form I 4DX1 (2) without ATP    | +           | This study                                        |
|         |         | Form II 4DX2 (2) with 5 mM ATP |             |                                                   |
|         | Chicken | 3JXI (4), 3JXI (2)             | +           | Landouré <i>et al.</i> , 2010<br>(ATP-free forms) |
| TRPV6   | Mouse   | 2RFA (1)                       | –           | Phelps <i>et al.</i> , 2008                       |

---

**Table S2.** Structural similarity between TRPV4-ARD and other TRPV-ARDs

| TRPV                  | TRPV1         | TRPV2         |                   |                   | TRPV6         | TRPV4             |                   |
|-----------------------|---------------|---------------|-------------------|-------------------|---------------|-------------------|-------------------|
| Species               | Rat           | Rat           |                   | Human             | Mouse         | Chicken           |                   |
| PDB                   | 2PNN          | 2ETB          | 2ETC <sup>a</sup> | 2F37 <sup>a</sup> | 2RFA          | 3JXI <sup>a</sup> | 3JXJ <sup>a</sup> |
| RMSD <sup>b</sup>     |               |               |                   |                   |               |                   |                   |
| Finger 2 <sup>c</sup> | 1.596 / 0.279 | 1.527 / 0.245 | 1.251 / 1.081     | 1.577 / 0.227     | 1.538 / 0.259 | 0.183 / 1.599     | 0.213 / 1.617     |
| Finger 3 <sup>d</sup> | 4.588 / 1.762 | 5.168 / 2.444 | 3.652 / 3.941     | 5.266 / 1.949     | 5.135 / 1.972 | 3.587 / 4.732     | 2.934 / 4.393     |
| Core <sup>e</sup>     | 1.593 / 1.653 | 1.378 / 1.457 | 1.451 / 1.573     | 1.463 / 1.541     | 1.865 / 1.736 | 0.691 / 0.737     | 0.637 / 0.676     |

<sup>a</sup> Only the chains with complete loops were used in the analysis. <sup>b</sup> RMSD to human TRPV4-ARD (ATP-free, form I / ATP-bound, form II). <sup>c</sup> Residues 229-240 in hTRPV4. <sup>d</sup> Residues 261-287 in hTRPV4. <sup>e</sup> Residues 152-176, 194-228, 241-260, 288-307, 324-356, 373-394 in hTRPV4.

**Table S3.** Molecular dynamics simulations of rat TRPV1-ARD

| Label             | $t_{\text{sim}}$ (ns) | Type <sup>†</sup> | Ensemble | SMD atoms                        | Speed<br>(nm/ns) |
|-------------------|-----------------------|-------------------|----------|----------------------------------|------------------|
|                   | 1.1 <sup>‡</sup>      | <i>EQ</i>         | NpT      | -                                | -                |
| TRPV1-ARD-<br>ATP | 1.6                   | <i>SMD</i>        | NVE      | L111-C $\alpha$ /H358-C $\alpha$ | 20               |
|                   | 8.3                   | <i>SMD</i>        | NpT      | L111-C $\alpha$ /H358-C $\alpha$ | 2                |
|                   | 1.1 <sup>‡</sup>      | <i>EQ</i>         | NpT      | -                                | -                |
| TRPV1-ARD-Apo     | 1.6                   | <i>SMD</i>        | NVE      | L111-C $\alpha$ /H358-C $\alpha$ | 20               |
|                   | 8.3                   | <i>SMD</i>        | NpT      | L111-C $\alpha$ /H358-C $\alpha$ | 2                |

<sup>†</sup> EQ denotes equilibrium simulations and SMD denotes constant velocity steered molecular dynamics.

<sup>‡</sup> These simulations consisted of 1,000 steps of minimization, 100 ps of dynamics with the backbone of the protein restrained ( $k = 1$  kcal/mol/Å<sup>2</sup>), and the remaining time as free dynamics in the NpT ensemble (Langevin damping set to 1 ps<sup>-1</sup>).

**Table S4.** T<sub>m</sub> of wildtype and mutant TRPV4-ARD proteins

| Protein | N | Mean           |   | Std Dev |  | p-Value |   |
|---------|---|----------------|---|---------|--|---------|---|
|         |   | T <sub>m</sub> | ± | (°C)    |  |         |   |
| WT      | 8 | 37.93          | ± | 0.08    |  | 1       |   |
| E183K   | 3 | 33.78          | ± | 0.06    |  | <.0001  | * |
| K197R   | 3 | 35.3           | ± | 0.1     |  | <.0001  | * |
| L199F   | 3 | 32.9           | ± | 0.1     |  | <.0001  | * |
| R232C   | 3 | 38.1           | ± | 0.1     |  | 0.8415  |   |
| R269C   | 3 | 38.6           | ± | 0.2     |  | <.0001  | * |
| R269H   | 3 | 36.8           | ± | 0.3     |  | <.0001  | * |
| E278K   | 3 | 37.3           | ± | 0.2     |  | <.0001  | * |
| R315W   | 3 | 36.2           | ± | 0.2     |  | <.0001  | * |
| R316C   | 3 | 34.7           | ± | 0.3     |  | <.0001  | * |
| I331F   | 3 | 35.5           | ± | 0.2     |  | <.0001  | * |
| I331T   | 3 | 37.97          | ± | 0.07    |  | 1       |   |
| D333G   | 3 | 36.4           | ± | 0.2     |  | <.0001  | * |
| V342F   | 3 | 35.4           | ± | 0.3     |  | <.0001  | * |

A

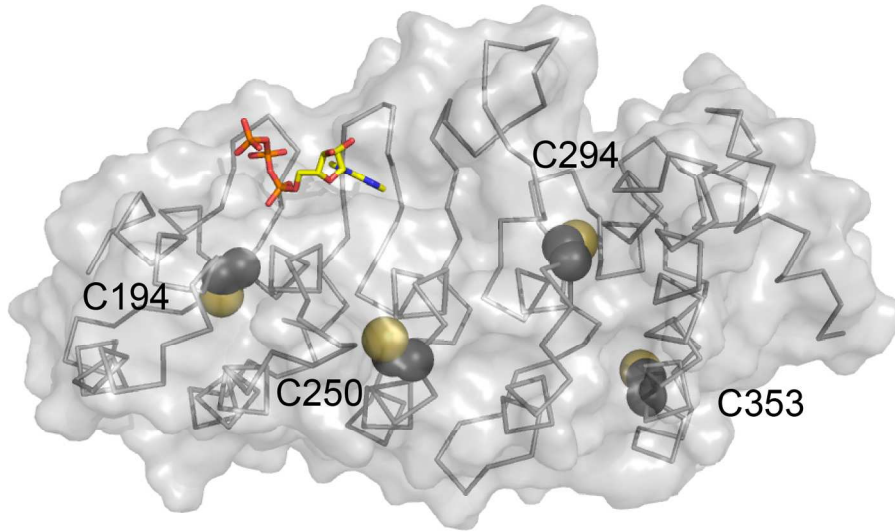

B

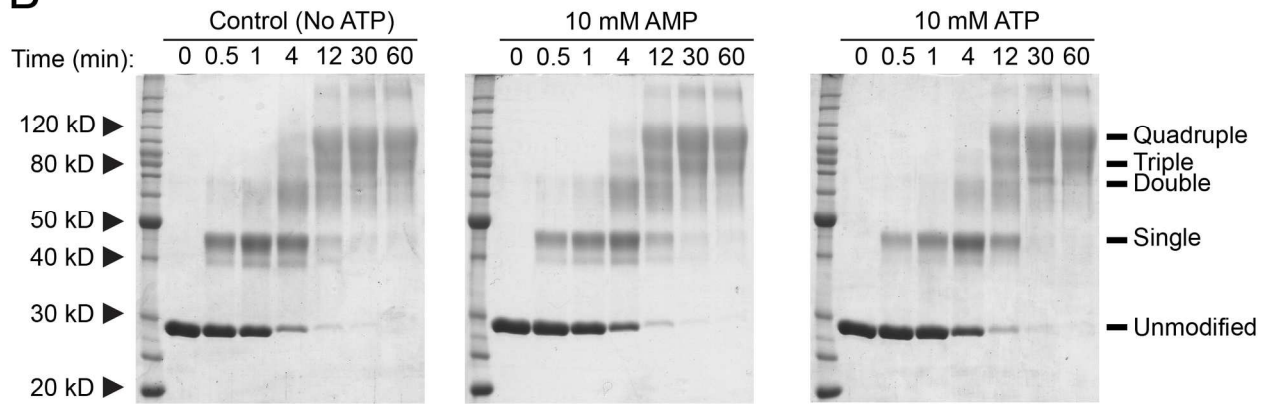

C

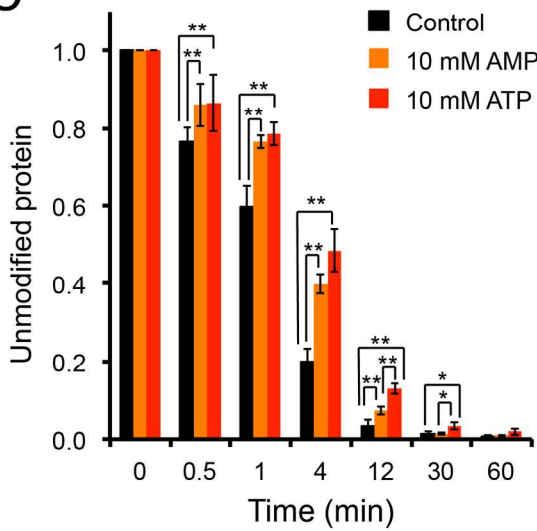

D

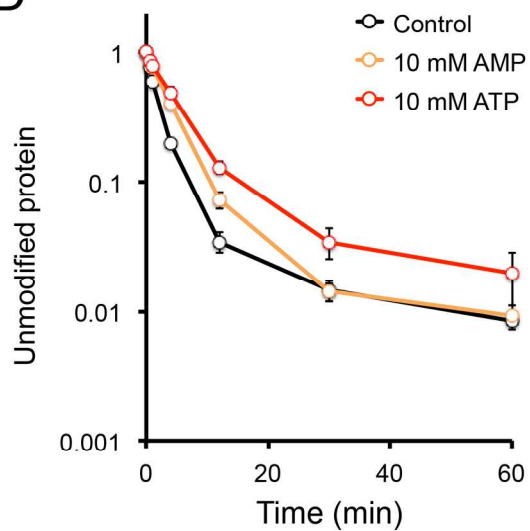

**Figure S1.** ATP binding effect on protein folding/flexibility in hTRPV4-ARD. A, hTRPV4-ARD contains four cysteines (Cys194, Cys250, Cys294, and Cys353; spheres). Bound ATP is shown as yellow sticks. Cys194 corresponds to Cys157 in TRPV1, which is required for activation by chemical modification with allicin, a garlic extract compound.<sup>1</sup> B, Time course for modification of hTRPV4-ARD cysteines by PEG-maleimide (mPEG). Reactions containing hTRPV4-ARD (8.5  $\mu$ M) in 150 mM NaCl, 20 mM Tris (pH 7.0), 0.5 mM mPEG-5 kDa (Creative PEGWorks) and 10 mM nucleotide as indicated, were incubated at room temperature, stopped by addition of DTT to 110 mM, and analyzed by Coomassie-stained 12% SDS-PAGE. hTRPV4-ARD modification at cysteine residues resulted in electrophoretic mobility shifts on a Coomassie-stained SDS-gel. Unmodified protein is reduced and modified proteins (single, double, triple, and quadruple) are increased in a time-dependent manner. Shown is a representative Coomassie-stained gel from one of three experiments. The statistical significance of the change in unmodified protein with respect to time point 0 was determined by a multiple comparison test using Tukey-Kramer method, with  $p < 0.05$  and  $p < 0.01$  indicated by \* and \*\*, respectively. C, Amount of unmodified protein in (B) is quantified as the mean  $\pm$  standard deviation. D, Same data as in (C) with vertical axis in log scale.

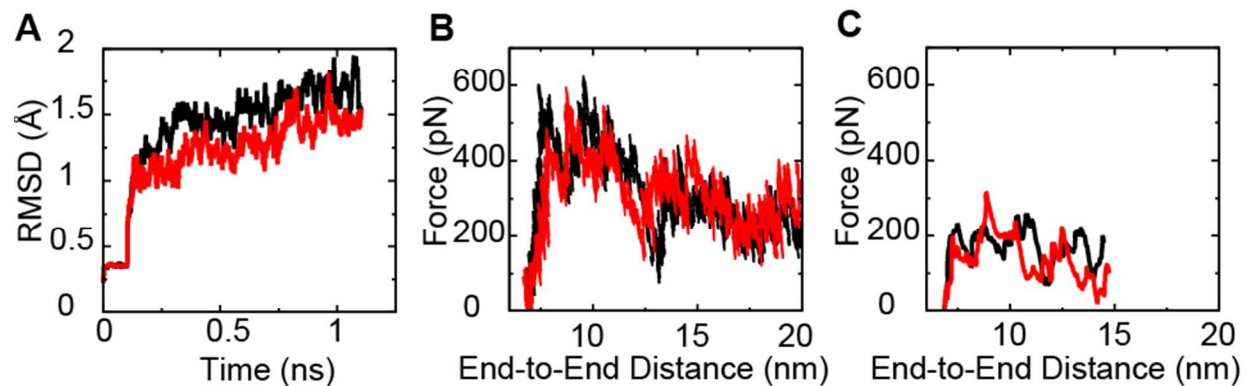

**Figure S2.** Stability of TRPV1-ARD in equilibrium and SMD simulations. A, Root mean square deviation (RMSD) is shown versus time during equilibrium simulations in the presence (red) and absence (black) of ATP. B and C, Force required to stretch and unfold TRPV1-ARD is shown as a function of the protein's end-to-end distance for simulations performed at 20 (B) and 2 nm/ns (C) with (red) and without (black) bound ATP.



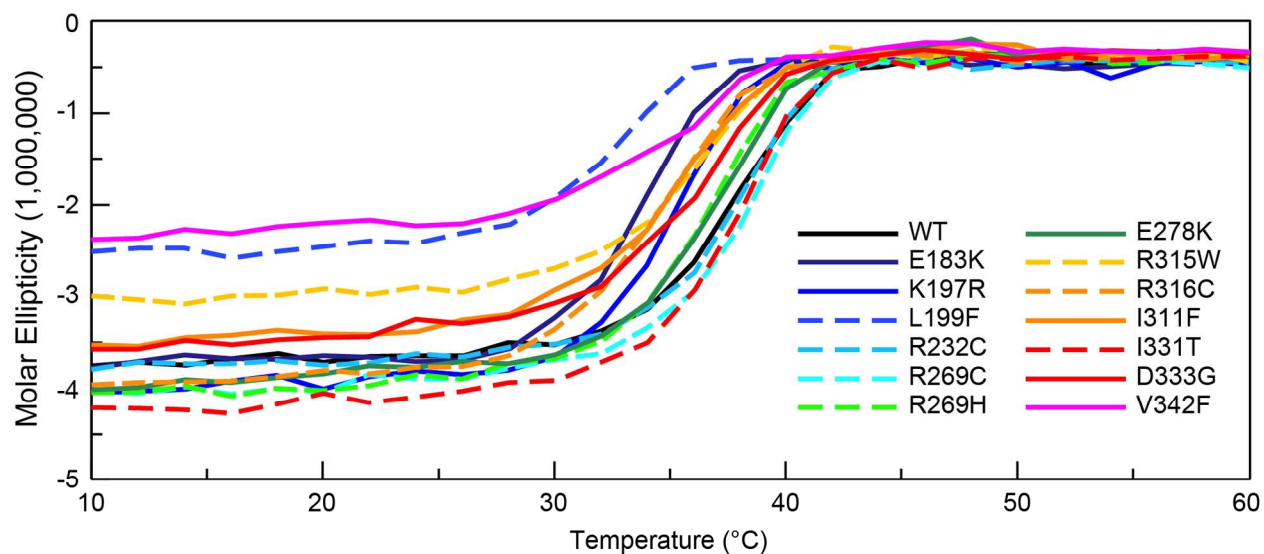

**Figure S3.** The thermal stability of wildtype and mutant TRPV4-ARD proteins. The molar ellipticity at  $\lambda = 222$  nm was measured as the protein solutions were heated by 1 °C/min.

### Supplementary References

1. Salazar, H., Llorente, I., Jara-Oseguera, A., Garcia-Villegas, R., Munari, M., Gordon, S. E., Islas, L. D., and Rosenbaum, T. (2008) A single N-terminal cysteine in TRPV1 determines activation by pungent compounds from onion and garlic, *Nat Neurosci* 11, 255-261.
